# Supplementary material for: Building Self-Esteem.
Source: MDPI journal article supplement (doi:10.3390/jcm13020438), 1991-01-01
Supplement: s1 [file s1]

File S1: Survey Questionnaire Form

Barriers in undertaking cardiopulmonary resuscitation reported by medical students - the state of knowledge in the period after the SARS CoV-2 pandemic

1. Age in years

Enter your answer

2. Gender

Male

Woman

I don't want to answer that question

3. Direction

Medical

Medical - Dental Department

4. Voivodship (origin)

Enter your answer

5. Have you attended a first aid course or school activity (at school, driving school, university classes, privately, at work)?

NO, never (in which case go to question 10)

YES, within 1 year

YES, > 1 year

6. Have you trained the skills of assessing consciousness and the presence of normal breathing (on a phantom or a phantom)?

YES

NO

7. Have you trained compressions and rescue breaths on an adult phantom during the training or classes?

YES

NO

8. Have you trained compressions and rescue breaths on a child's phantom during the training or classes?

YES

NO

9. Have you trained in the use of an automated defibrillator (AED) during your training or classes?

YES

NO

10. Does the outbreak of the SARS CoV2 pandemic make you afraid of performing CPR?

YES

NO

11. Which of the following would you undertake a consciousness assessment, breathing assessment and CPR? (select all that apply)

Family member

Child

A person I know (acquaintance, co-workers, neighbors, etc.)

Stranger

I would not take any action, regardless of the circumstances and who the victim is

12. Would you use an automated defibrillator (AED) if it was available nearby?

YES

NO

13. Tick all the statements that define your barriers/fear of starting CPR:

I don't know enough to perform CPR

I don't have enough skills to perform CPR

I don't have the confidence to start CPR

I'm afraid of being infected with unspecified disease

I'm afraid of being infected with coronavirus

I'm afraid I'm going to panic

I'm afraid I'm going to hurt the victim

I'm afraid of the legal consequences of incorrect actions

I'm afraid that the victim will be in a sitting position

I'm afraid that the victim will be lying on the bed

I'm afraid that the victim will be lying on his stomach

I'm afraid the victim will be covered in blood

I'm afraid that the victim's will be covered in vomit

I'm afraid that there will be a odour of alcohol coming from the victim

I'm afraid of CPR if the victim is a woman

I'm afraid of CPR if the victim is a man

I'm afraid I won't be able to do it because of my physical condition

Low socio-economic status of the victim

Multiple witnesses to the incident at the scene

Uncertainty about whether I will correctly diagnose cardiac arrest

The victim's advanced age

The victim is a child

For no particular reason
